# Supplementary material for: Longitudinal tumor hypoxia imaging with [18F]FAZA-PET provides early prediction of nanoliposomal irinotecan (nal-IRI) treatment activity
Source: Springer Nature journal article supplement (doi:10.1186/s13550-015-0135-x), 2015-10-19

**Suppl. Figure S1.** Mean FAZA administration dose (MBq/g) calculated for animals belonging to each treatment group over 7 imaging sessions.

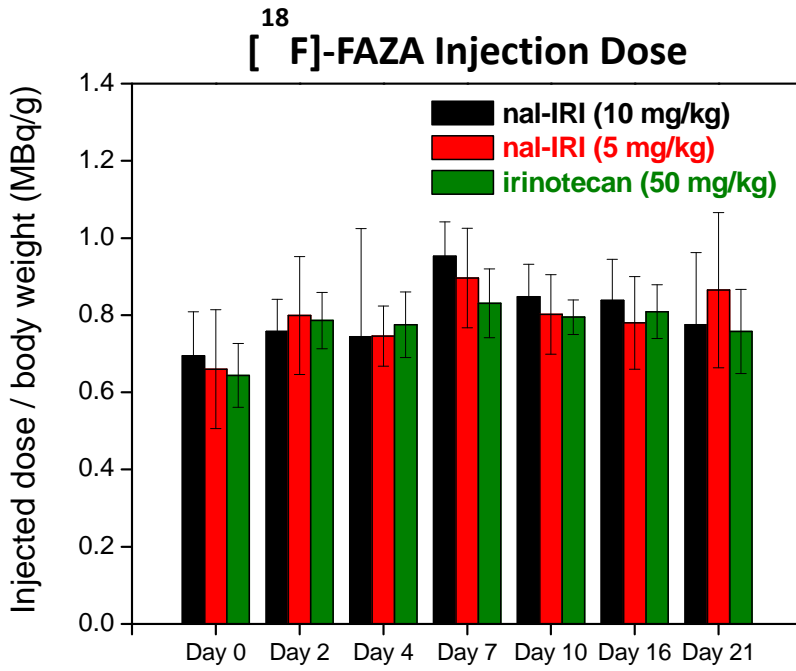

**Suppl. Figure S2.** Tumor volume correlation between measurements performed using caliper and CT.

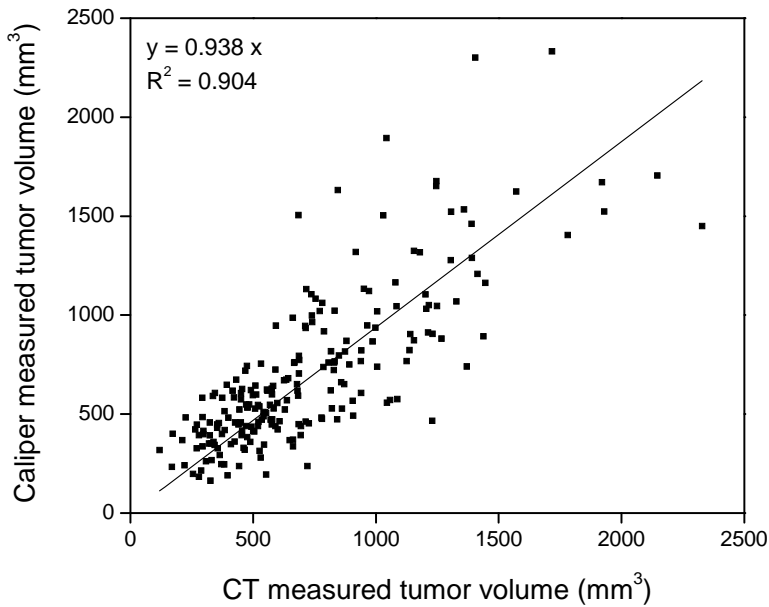

**Suppl. Figure S3.** Longitudinal muscle FAZA uptake (%ID/g) measured from the CT data set over a 21-day period following the first treatment dose administration (day 0). Each data point (except for day 21, transparently masked in grey) represents the mean  $\pm$  standard deviation obtained from 5 animals.

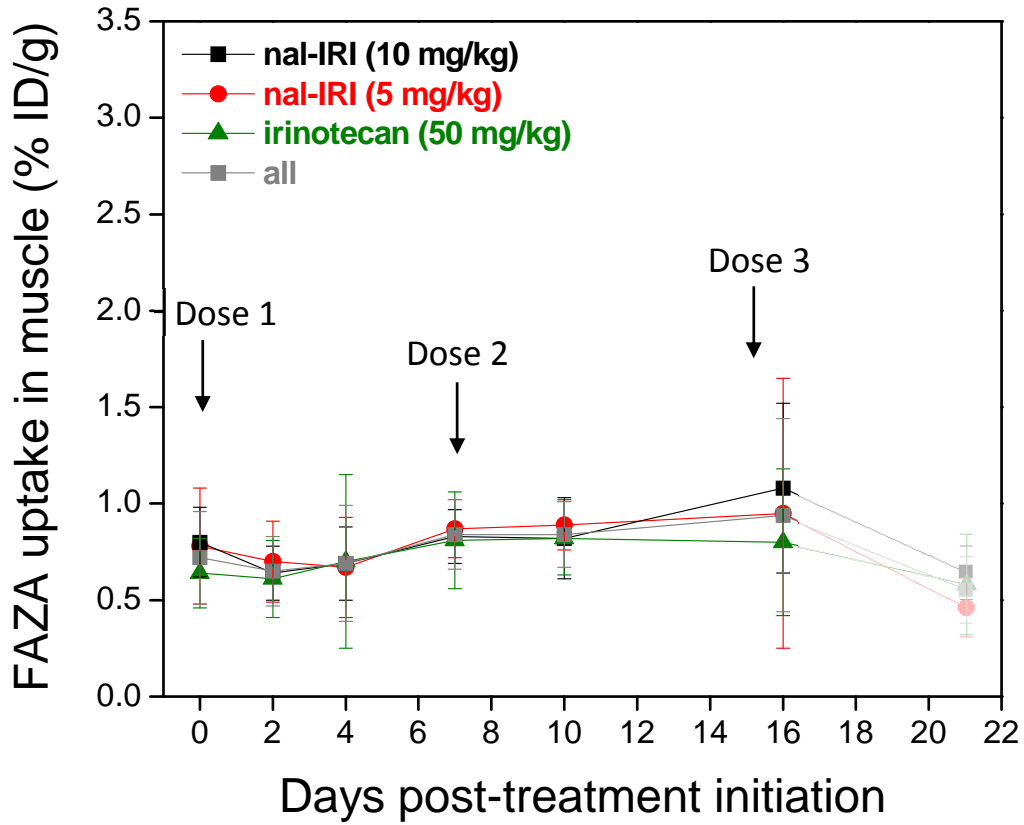

Supplement: MOESM1 [file 9786414]
